# Supplementary material for: Manganese ions conjugated on layered bismuth oxyhalides for high-performance pseudocapacitors and efficient oxygen evolution catalysts
Source: Royal Society of Chemistry journal article supplement (doi:10.1039/d0qi00776e), 2020-01-01
Supplement: d0qi00776e2.pdf [file d0qi00776e2.pdf]

**Electronic Supplementary information**

**Manganese ions conjugated on layered bismuth oxyhalide for high-performance pseudo-capacitor and efficient oxygen evolution catalyst**

Shiva Kumar Arumugasamy<sup>a</sup>, Saravanan Govindaraju<sup>a,\*</sup>, Kyusik Yun<sup>a,\*</sup>

<sup>a</sup> Department of Bionanotechnology, Gachon University, Gyeonggi-do, 13120, Republic of South Korea

**Corresponding Author**

\*E-mail: [biovijaysaran@gmail.com](mailto:biovijaysaran@gmail.com) (S.G), [ykyusik@gachon.ac.kr](mailto:ykyusik@gachon.ac.kr) (K. Yun).

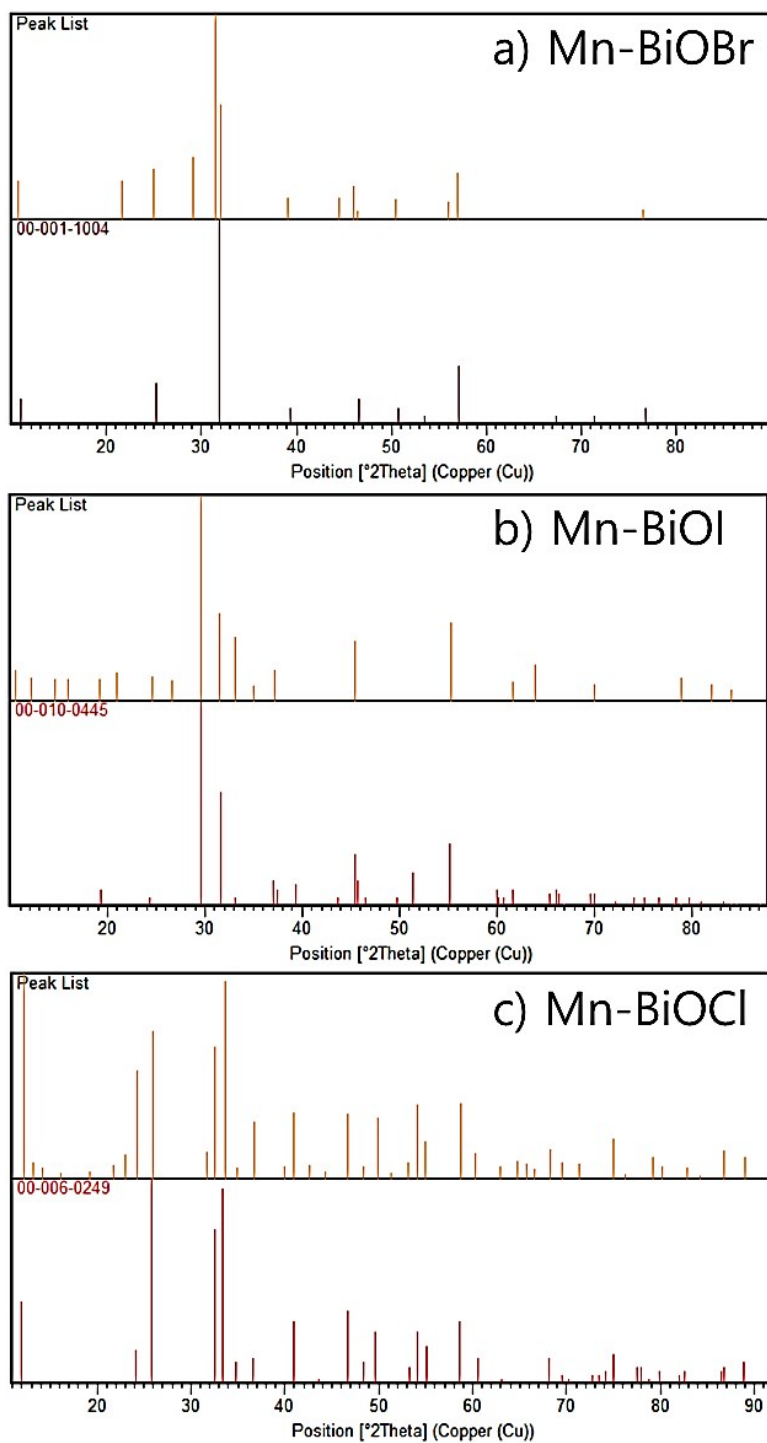

**Fig. S1** Simulated XRD peak patterns for Mn-BiOX crystals.

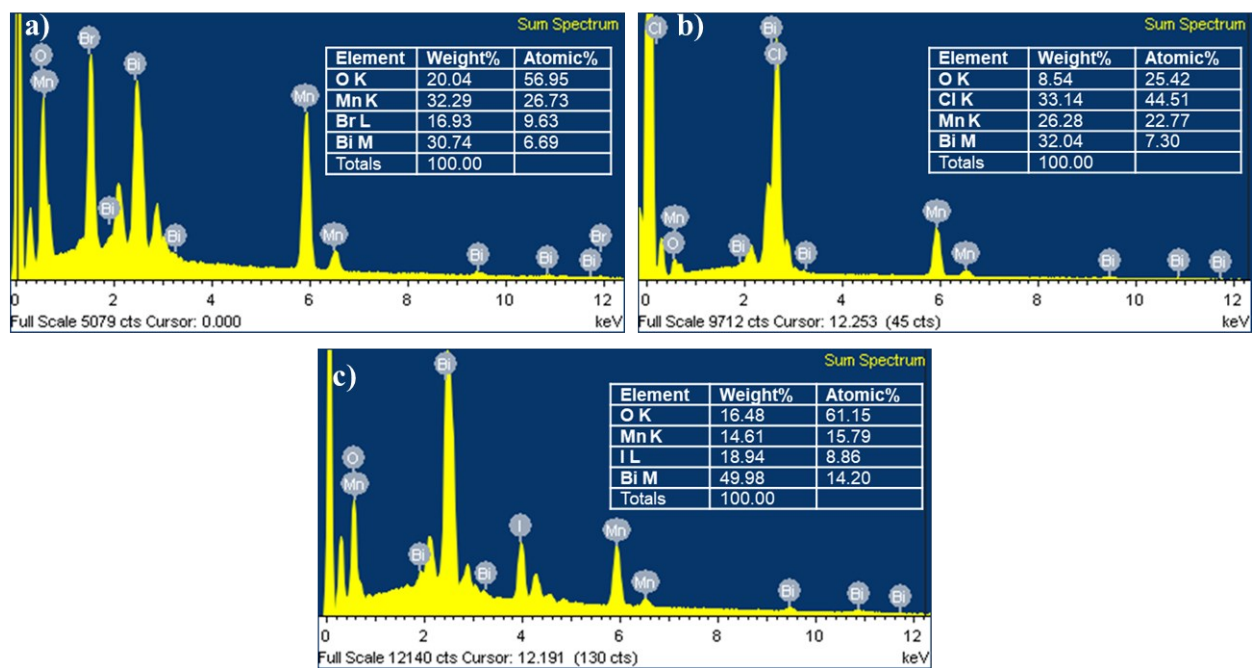

**Fig. S2** EDS analysis for Mn-BiOX (X = Br, Cl and I) crystals.

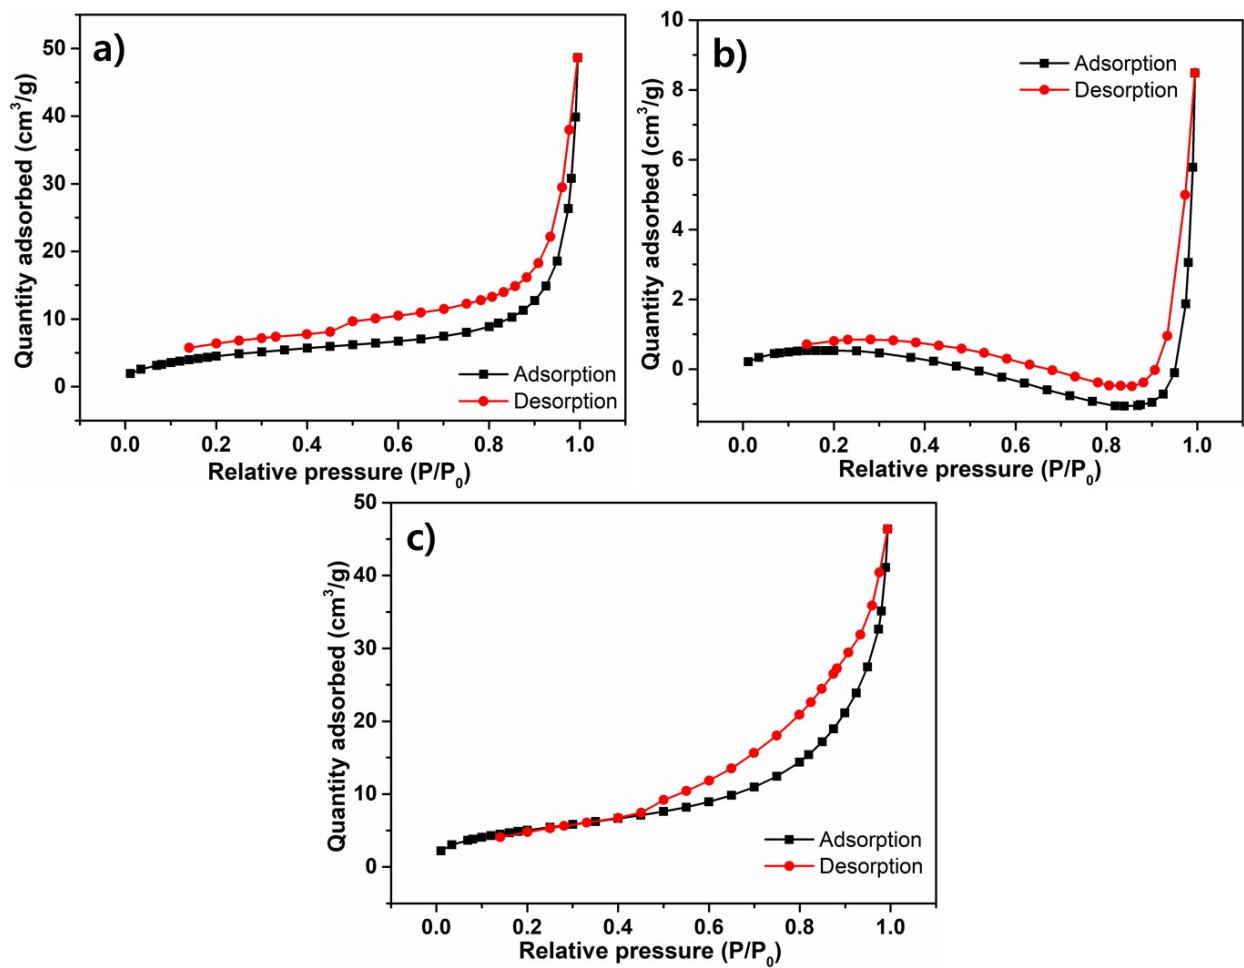

**Fig. S3** Nitrogen adsorption-desorption isotherm of Mn-BiOX crystals (a: Mn-BiOBr, b: Mn-BiOI, and c: Mn-BiOCl).

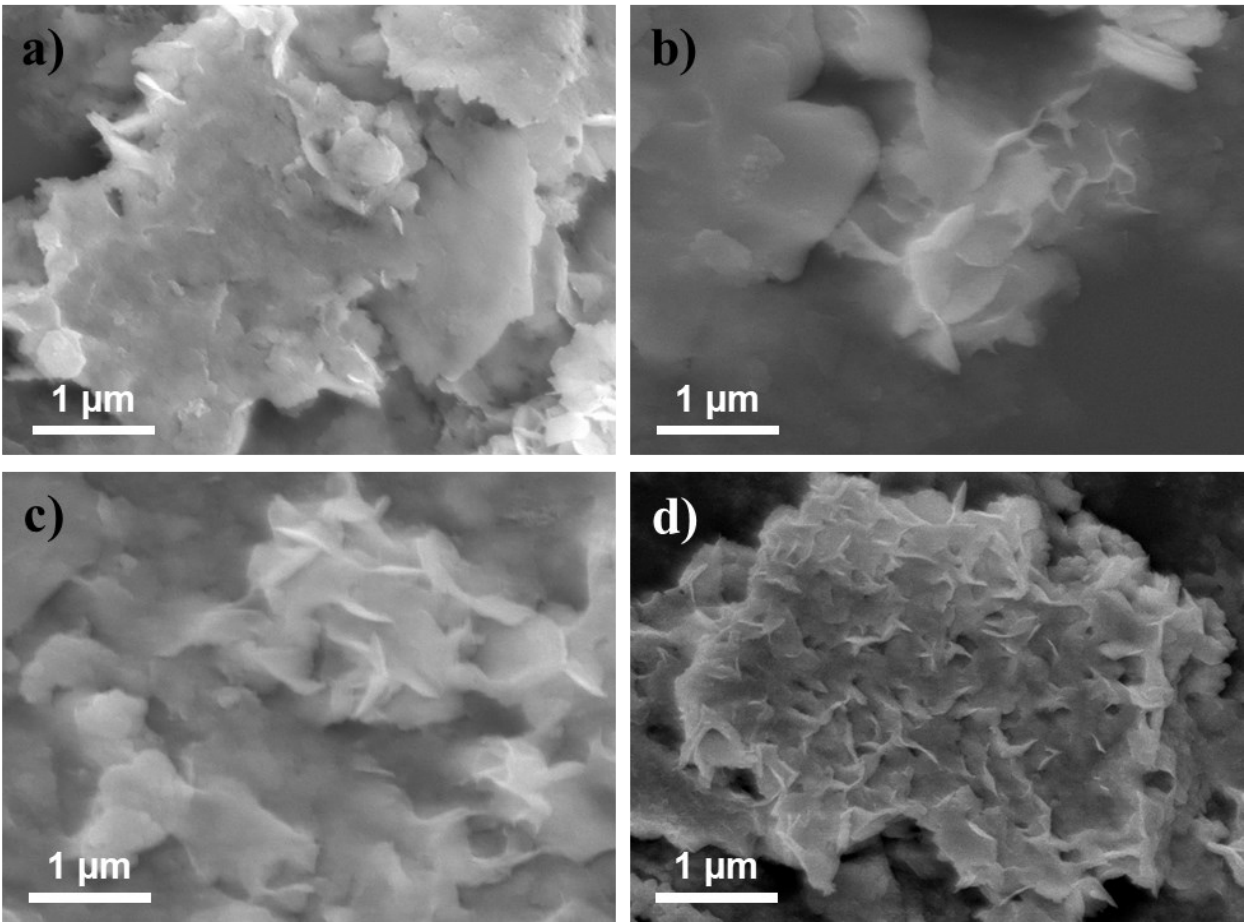

**Fig. S4** FE-SEM images visualizing the growth mechanism of Mn-BiOCl material at various time intervals a) 1 h, b) 4 h, c) 8 h, and d) 12 h respectively.

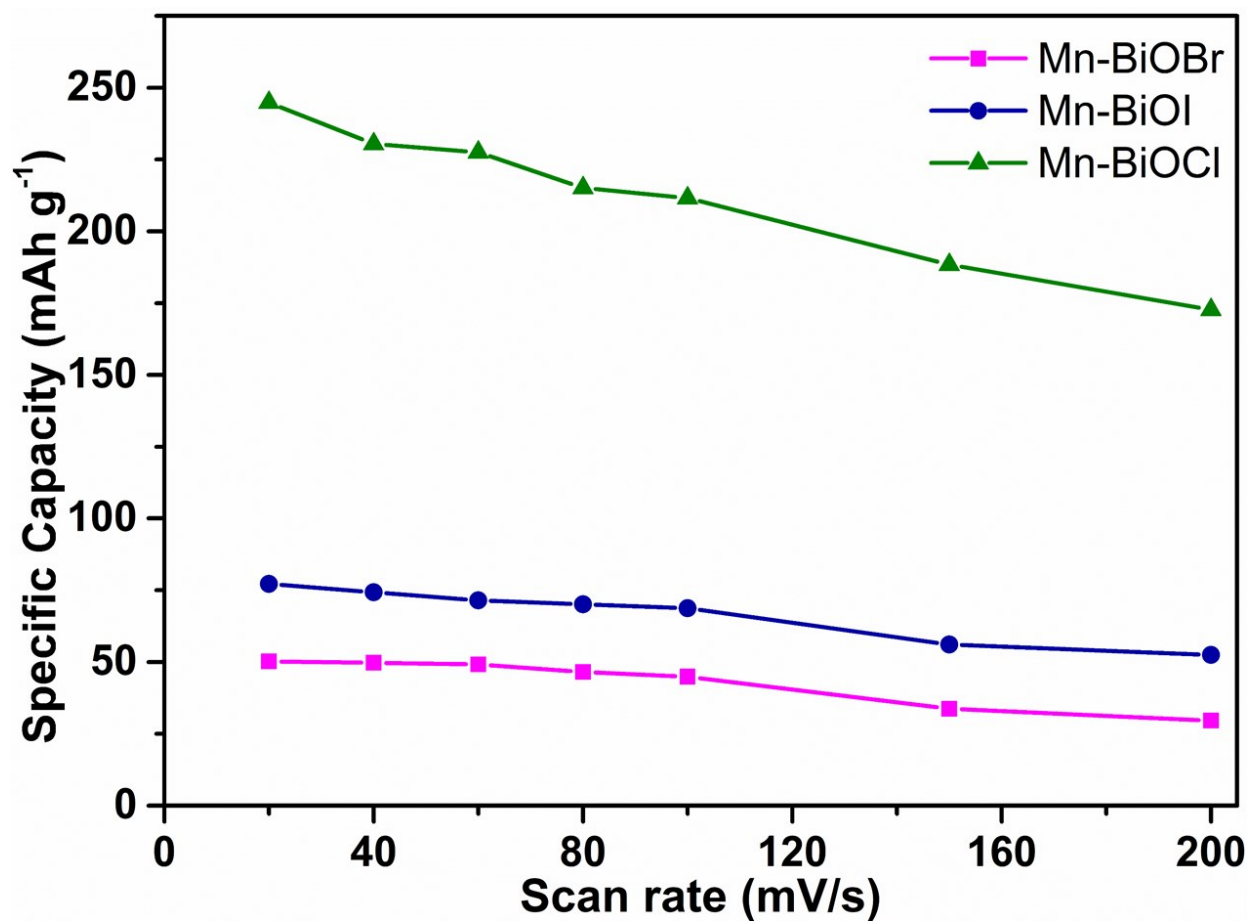

Fig. S5 Specific capacitance calculation through CV profiles for Mn-BiOX crystals.

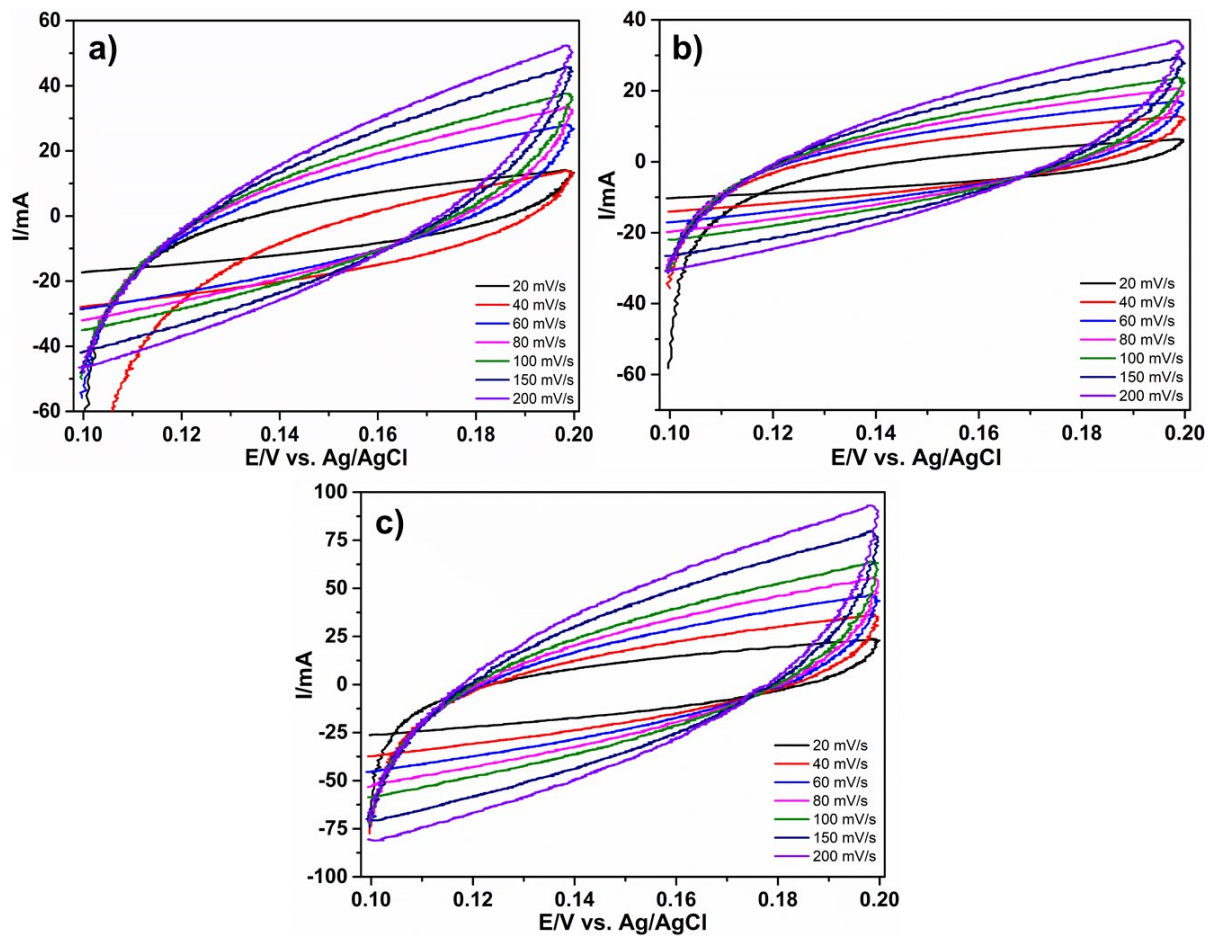

**Fig. S6** CV profile for calculating double layer capacitance in the potential window of 0.1-0.2V using 1M KOH for the synthesized Mn-BiOX (X = Cl, Br, and I) materials.

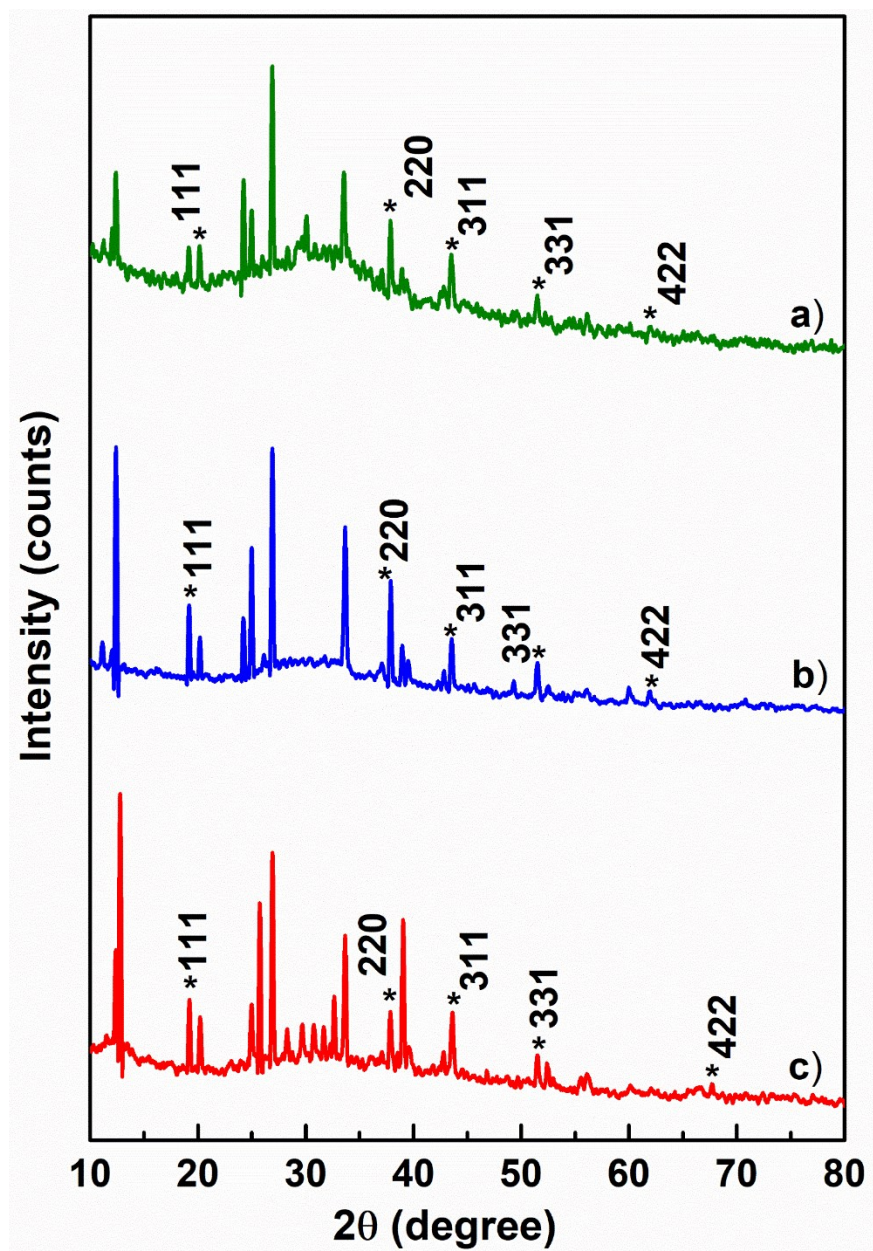

**Fig. S7** XRD analysis after performing the chronoamperometric analysis for measuring the material stability (a: Mn-BiOBr, b: Mn-BiOI and c: Mn-BiOCl).



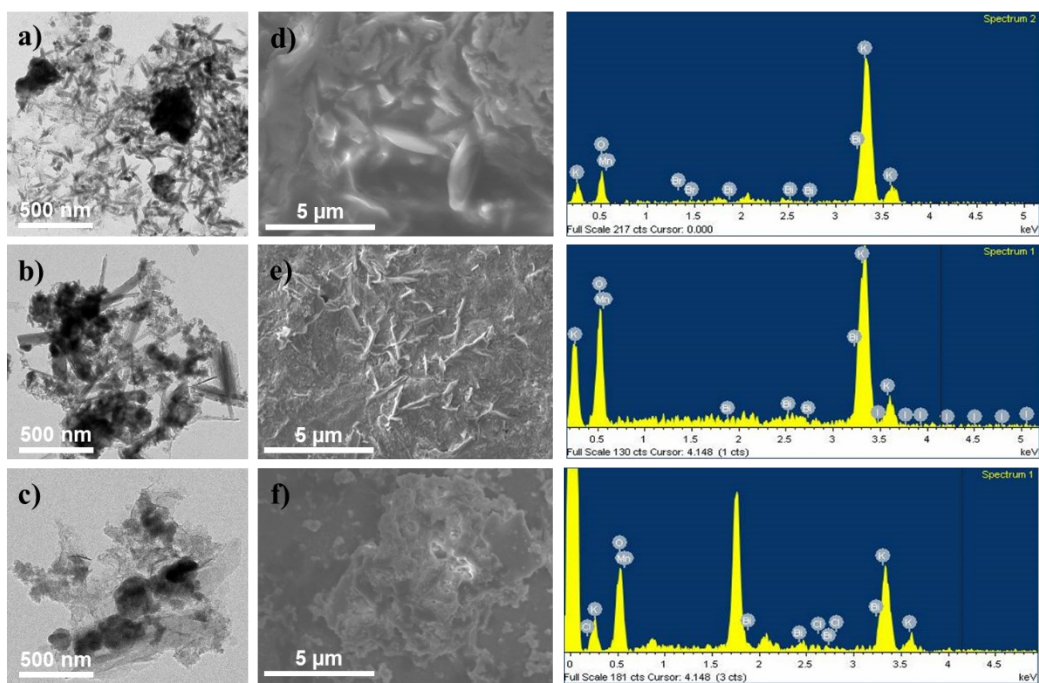

**Fig. S8** TEM, FE-SEM and EDS analysis after performing the chronoamperometric analysis for measuring the material stability (a, d: Mn-BiOBr, b, e: Mn-BiOI and c, f: Mn-BiOCl)

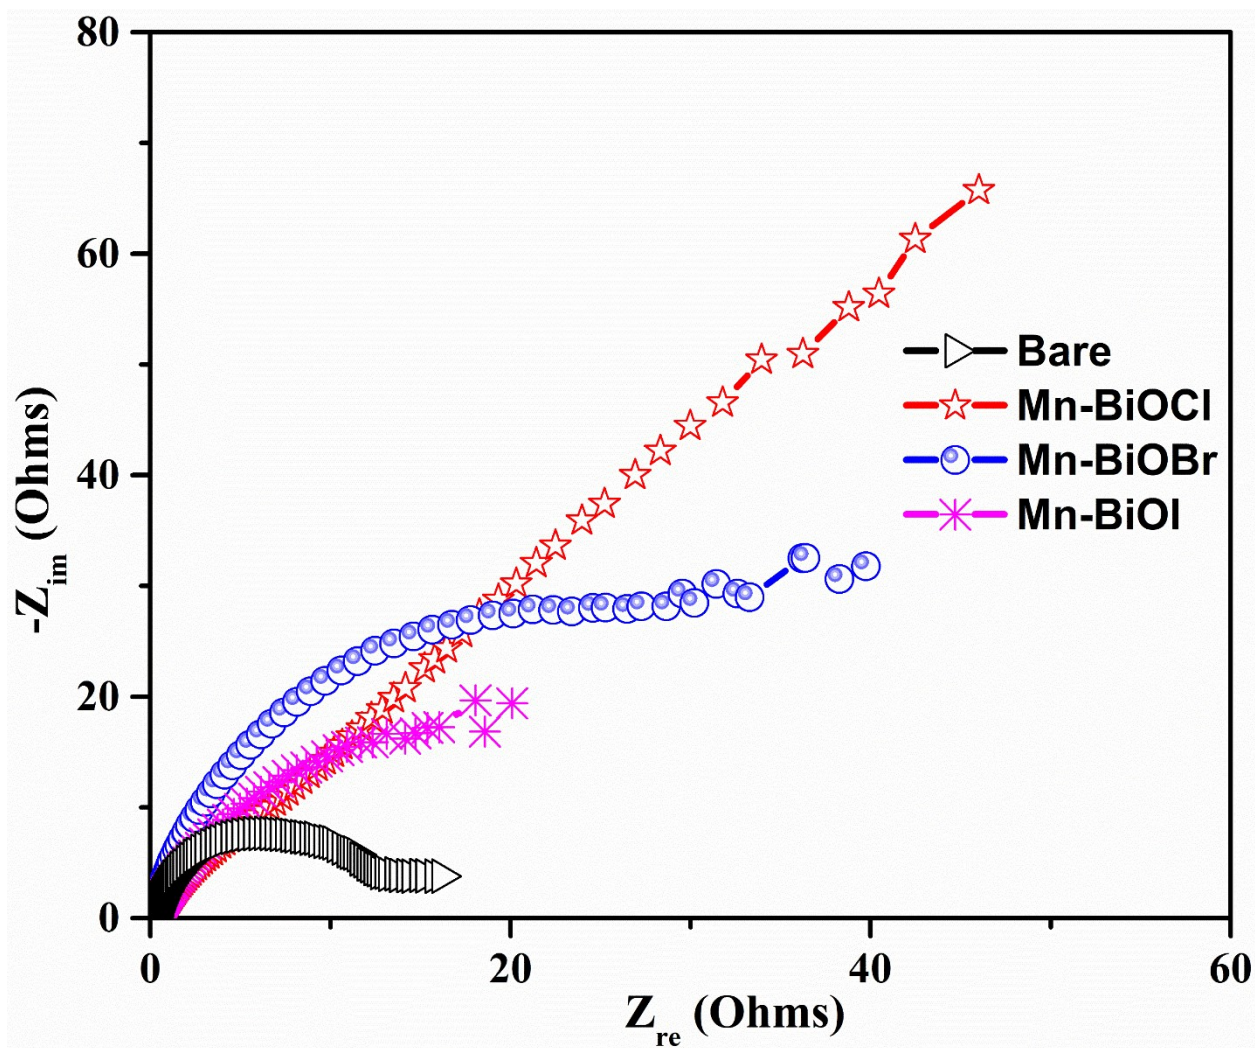

**Fig. S9** Nyquist plot analysis after performing the chronoamperometric analysis for measuring the material stability.

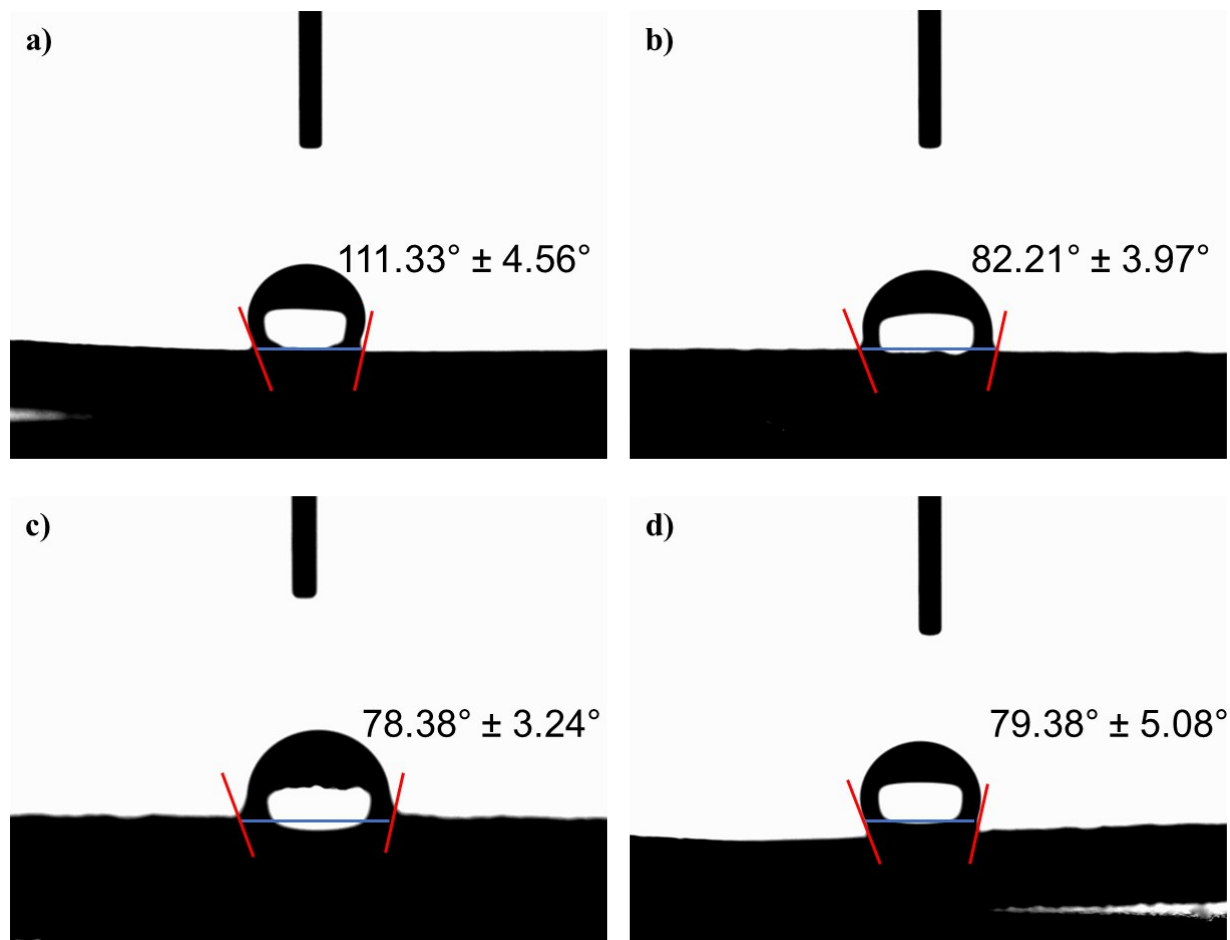

**Fig. S10** Contact angle measurement strategy to determine the bonding nature between the electrode and synthesized materials a) bare electrode, b) Mn-BiOBr modified electrode, c) Mn-BiOCl modified electrode and d) Mn-BiOI modified electrode.

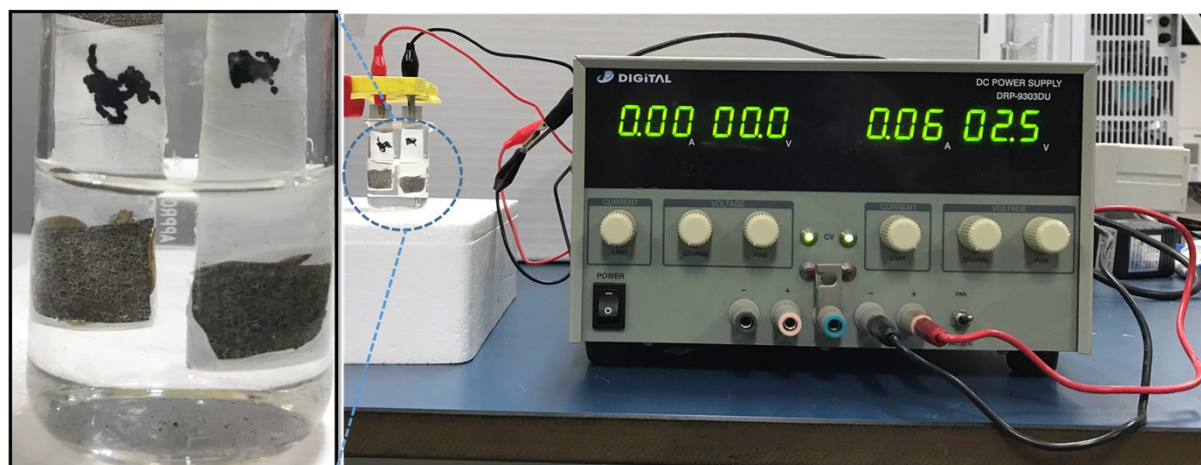

**Fig. S11** Practical applicability of the synthesized materials.

**Table. S1** Electrochemical Impedance spectroscopic values for Mn-BiOX (X= Br, I and Cl)

| Electrode surface | Fitting Parameters |                        |                       |                       |
|-------------------|--------------------|------------------------|-----------------------|-----------------------|
|                   | $R_S$ ( $\Omega$ ) | $C_{dl}$ (F)           | $R_{ct}$ ( $\Omega$ ) | Warburg ( $\Omega$ )  |
| Bare              | 2                  | $5.421 \times 10^{-6}$ | 8                     | $4.43 \times 10^{-7}$ |
| Mn-BiOBr          | 3                  | $2.142 \times 10^{-7}$ | 5                     | $5.16 \times 10^{-5}$ |
| Mn-BiOI           | 1.5                | $1.111 \times 10^{-6}$ | 3.5                   | $5.08 \times 10^{-5}$ |
| Mn-BiOCl          | 1                  | $3.939 \times 10^{-7}$ | 2                     | $1.72 \times 10^{-5}$ |

**Table. S2** Comparative capacitance study analysis with other materials

| S.No | Materials                                        | SC<br>(F/g) | ED<br>(Wh/Kg) | PD<br>(W/Kg) | Stability<br>(%) | Ref              |
|------|--------------------------------------------------|-------------|---------------|--------------|------------------|------------------|
| 1.   | BiOI/Bi <sub>9</sub> I <sub>2</sub>              | 122.43      | 38.2          | 228.4        | 90.1             | S1               |
| 2.   | BiOCl/Fe(III)                                    | 540         | 17            | 500          | 72               | S2               |
| 3.   | BiOCl/MXene                                      | 247.8       | 15.2          | 567.4        | 57.5             | S3               |
| 4.   | Bi <sub>7</sub> O <sub>9</sub> I <sub>3</sub>    | 347         | -             | -            | 65.5             | S4               |
| 5.   | BiOI                                             | 706         | -             | -            | 55               | S5               |
| 6.   | BiOCl/AC                                         | 1243        | 17.2          | 250.9        | 90.3             | S6               |
| 7.   | BiOCl/PANi                                       | 169.9       | -             | -            | -                | S7               |
| 8.   | Bi <sub>2</sub> O <sub>3</sub> -MnO <sub>2</sub> | 161         | 18.4          | 600          | 95               | S8               |
| 9.   | Bi <sub>2</sub> O <sub>3</sub>                   | 322.5       | 7.2           | 334.7        | 92               | S9               |
| 10.  | Bi <sub>2</sub> O <sub>3</sub> /rGO              | 617.1       | -             | -            | 79.5             | S10              |
| 11.  | Mn-BiOBr                                         | 676.8       | 6.47          | 918.75       | 89.4             | This<br>Wor<br>k |
|      | Mn-BiOI                                          | 861.7       | 10.9          | 831.25       | 88.6             |                  |
|      | Mn-BiOCl                                         | 2291.3      | 25.77         | 1400         | 86.4             |                  |

**Table. S3**

| S. No | Material                                                       | Electrolyte | Overpotential /<br>mV | Tafel / mV dec <sup>-1</sup> | Reference |
|-------|----------------------------------------------------------------|-------------|-----------------------|------------------------------|-----------|
| 1.    | Bi <sub>2</sub> S <sub>3</sub> /Ni <sub>3</sub> S <sub>2</sub> | 1M KOH      | 268                   | 82                           | S11       |
| 2.    | MA <sub>2</sub> CoBr <sub>4</sub>                              | PBS         | 528                   | 197                          | S12       |

|    |                                         |        |     |     |           |
|----|-----------------------------------------|--------|-----|-----|-----------|
| 3. | Fe <sub>1.75</sub> Mn <sub>0.25</sub> P | 1M KOH | 620 | 100 | S13       |
| 4. | Mn-BiOCl                                | 2M KOH | 325 | 160 | This work |
|    | Mn-BiOI                                 |        | 378 | 192 |           |
|    | Mn-BiOBr                                |        | 485 | 214 |           |

---

## References

- S1. S. Park, N. M. Shinde, P. V. Shinde, D. Lee, J. M. Yun and K. H. Kim, Chemically grown bismuth-oxy-iodide (BiOI/Bi<sub>9</sub>I<sub>2</sub>) nanostructure for high performance battery-type supercapacitor electrodes, *Dalton Tran.*, 2020, **49**, 774-780.
- S2. R. Rameshbabu, M. Sandhiya and M. Sathish, Fe (III) ions grafted bismuth oxychloride nanosheets for enhanced electrochemical supercapacitor application, *J. Electroanal. Chem.*, 2020, **862**, 113958.
- S3. Q. X. Xia, N. M. Shinde, J. M. Yun, T. Zhang, R. S. Mane, S. Mathur and K. H. Kim, Bismuth Oxychloride/MXene symmetric supercapacitor with high volumetric energy density, *Electrochim. Acta*, 2018, **271**, 351-360.
- S4. P. Wu, L. Feng, Y. Liang, X. Zhang, X. Li, S. Tian, H. Hu, G. Yin and S. Khan, Large-scale synthesis of 2D bismuth-enriched bismuth oxyiodides at low temperatures for high-performance supercapacitor and photocatalytic applications, *J. Mater. Sci: Mater. Electron.*, 2020, **31**, 5385-5401.
- S5. S. Vadivel, B. Saravanakumar, M. Kumaravel, D. Maruthamani, N. Balasubramanian, A. Manikandan, G. Ramadoss, B. Paul and S. Hariganesh, Facile solvothermal synthesis of BiOI microsquares as a novel electrode material for supercapacitor applications, *Mater. Lett.*, 2018, **210**, 109-112.

- S6. W. Hong, L. Wang, K. Liu, X. Han, Y. Zhou, P. Gao, R. Ding and E. Liu, Asymmetric supercapacitor constructed by self-assembled camellia-like BiOCl and activated carbon microspheres derived from sweet potato starch, *J. Alloy. Compd.*, 2018, **746**, 292-300.
- S7. G. Nie, X. Lu, W. Wang, M. Chi, Y. Jiang and C. Wang, One-dimensional polyaniline thorn/BiOCl chip heterostructures: self-sacrificial template-induced synthesis and electrochemical performance, *Materials Chemistry Frontiers* 2017, **5**, 859-866.
- S8. S. Singh, R. K. Sahoo, N. M. Shinde, J. M. Yun, R. S. Mane and K. H. Kim, Synthesis of Bi<sub>2</sub>O<sub>3</sub>-MnO<sub>2</sub> Nanocomposite Electrode for Wide-Potential Window High Performance Supercapacitor, *Energies*, 2019, **17**, 3320.
- S9. R. C. Ambare, P. Shinde, U. T. Nakate, B. J. Lokhande and R. S. Mane, Sprayed bismuth oxide interconnected nanoplate supercapacitor electrode materials, *Appl. Surf. Sci.*, 2018, **453**, 214-219.
- S10. S. Liu, Y. Wang and Z. Ma, Bi<sub>2</sub>O<sub>3</sub> with reduced graphene oxide composite as a supercapacitor electrode, *Int. J. Electrochem. Sci.*, 2018, **13**, 12256-12265.
- S11. S. Wang, W. Xue, Y. Fang, Y. Li, L. Yan, W. Wang and R. Zhao, Bismuth activated succulent-like binary metal sulfide heterostructure as a binder-free electrocatalyst for enhanced oxygen evolution reaction, *J. Colloid Interf. Sci.*, 2020.
- S12. R. Babu, A. K. Vardhaman, V. M. Dhavale, L. Giribabu and S. P. Singh, MA<sub>2</sub>CoBr<sub>4</sub>: lead-free cobalt-based perovskite for electrochemical conversion of water to oxygen, *Chem. Commun.*, 2019, **55**, 6779.
- S13. D. Li, H. Bayduon, B. Kulikowski and S. L. Brock, Boosting the catalytic performance of iron phosphide nanorods for the oxygen evolution reaction by incorporation of manganese, *Chem. Mater.*, 2017, **29**, 3048.
